# Supplementary material for: Label-free fluorescence detection of microRNA based on target induced adenosine2–coralyne–adenosine2 formation
Source: Royal Society of Chemistry journal article supplement (doi:10.1039/c6an00001k), 2016-01-01
Supplement: c6an00001k1.pdf [file c6an00001k1.pdf]

## Electronic Supplementary Information (ESI)

# Label-free fluorescence detection of microRNA based on target induced adenosine<sub>2</sub>-coralyne- adenosine<sub>2</sub> formation

Jun-Jie Li, Qiang Xi, Wen-Fang Du, Ru-Qin Yu\*, and Jian-Hui Jiang\*

State Key Laboratory of Chemo/Biosensing and Chemometrics, College of Chemistry  
and Chemical Engineering, Hunan University, Changsha 410082, P. R. China

\* Corresponding authors. E-mail: rqu@hnu.edu.cn; jianhuijiang@hnu.edu.cn. Tel.:

86-731-88822577; Fax: 86-731-88822872.

## **Experimental Section**

### **Materials and chemicals**

The DNA oligonucleotides used in this study (sequences shown in Table S1) were synthesized and purified through HPLC by Sangon Biotech (Shanghai) Co., Ltd. (Shanghai, China). RNase-free H<sub>2</sub>O and RNase inhibitor were obtained from Takara Biotechnology Co., Ltd. (Dalian, China). Coralyne chloride hydrate (coralyne) was obtained from Sigma-Aldrich (St. Louis, MO). SYBR Green I (10,000× stock solution in dimethyl sulfoxide) was obtained from Life Technologies Corporation (USA). Streptavidin magnetic beads (SA-MB) and poly(A) polymerase were purchased from the New England Biolabs Ltd. (Beijing, China). ATP and SSC buffer (20×, 3 M NaCl, 300 mM Sodium citrate, pH 7.0) were obtained from Sangon Biotech (Shanghai, China) Co., Ltd. (Shanghai, China). All solutions used in the assay were prepared using RNase-free H<sub>2</sub>O.

### **Procedures of miRNAs detection**

The assay procedures can be briefly described as follows. Firstly, reaction mixture containing different concentrations of target miRNA, together with 1 U/μL of RNase inhibitor, 0.05 U/μL of poly(A) polymerase, 1 mM ATP, and 1× poly(A) buffer (50 mM Tris-HCl, 250 mM NaCl, 10 mM MgCl<sub>2</sub>, pH 7.9) was incubated at 37 °C for 2 h. Following the addition of 2 μL of 2 μM biotin-DNA together with SYBR Green I and coralyne, 20 μL 10× SSC and 5 μL 4 mg/mL SA-MB (streptavidin magnetic beads) was added and incubated at room temperature for 30 min. After rinsed with 1× SSC for three times, the beads were directly subjected to for fluorescence assay.

**Table S1.** Sequences of Oligonucleotides

| Name      | Sequence (5'-3')                         |
|-----------|------------------------------------------|
| DNA probe | TCAACATCAGTCTGATAAGCTATTTTTTTTTTT-biotin |
| MiRNA-21  | UAGC UUAU CAGA CUGA UGUU GA              |
| Let-7a    | UGA GGU AGU AGG UUG UAU AGU U            |
| MiRNA-141 | UAA CAC UGU CUG GUA AAG AUG G            |
| MiRNA-143 | UGA GAU GAA GCA CUG UAG CUC A            |

**Table S2** Comparison of this method and other assays

| Methods                                                                         | Detection limit | Analytical Time | Specificity                                                                                                  | Complexity level                                                                              | Ref.       |
|---------------------------------------------------------------------------------|-----------------|-----------------|--------------------------------------------------------------------------------------------------------------|-----------------------------------------------------------------------------------------------|------------|
| Label-free SERS                                                                 | 28 nM           | overnight       | Not reported                                                                                                 | High complexity including synthesis and careful treatment of silver nanorod                   | 1          |
| Silver nanocluster DNA Probe                                                    | 20 nM           | ~1.5 h          | High specificity toward detecting specific miRNA sequences is possible                                       | High complexity including synthesis of silver nanocluster                                     | 2          |
| Multiplexed detection using cationic polythiophene                              | 1.26 nM         | ~4.5 h          | Good specificity for the use of inherently encoded nanorods                                                  | High complexity including synthesis of metallic striped nanorods                              | 3          |
| Colorimetric detection                                                          | 16 pM           | ~4 h            | Good selectivity due to the high specificity of the duplex-specific nuclease to perfectly matched duplexes   | High complexity including preparation of oligonucleotide-functionalized AuNPs                 | 4          |
| label-free assay based on fluorescence quenching of AuNPs                       | 3.8 pM          | ~7.5 h          | High specificity of discriminating single-nucleotide differences                                             | High complexity including preparation of AuNPs and immobilization of probe DNA                | 5          |
| simple molecular beacon                                                         | 3.8 pM          | ~2 h            | Good specificity for the intrinsic property of duplex-specific nuclease                                      | High complexity including dual labeling and high cost                                         | 6          |
| microRNA-activated molecular machine                                            | 80 fM           | ~3.5 h          | High selectivity for the base-mismatch discrimination capability of the toehold strand displacement reaction | High complexity including dual labeling and the design of three-strand DNA complex probes     | 7          |
| Direct detection by using the p19 protein-functionalized magnetic beads (PFMBs) | 1 fM            | ~9 h            | High selectivity due to the low nonspecific adsorption of PFMBs                                              | High complexity including the design of multiple probes                                       | 8          |
| Electrochemiluminescent biosensor                                               | 0.3 fM          | ~5.5 h          | High specificity induced by the dual signal amplification                                                    | High complexity including electrode modification and Rolling Circle Amplifications reaction   | 9          |
| Enzymeless electrochemical signal amplification                                 | 0.1 fM          | ~0.5 h          | Good selectivity resulting from the distinct thermodynamic properties in the triple-stem structure           | High complexity including preparation of the electrode and DNA monolayer assembly             | 10         |
| Label-free fluorescence detection                                               | 0.5 nM          | ~2.5 h          | Improved specificity because of poly(A) polymerase reaction                                                  | Low complexity with simple design of probe, label-free detection and easy operation, low cost | This study |

## References

- 1 J. D. Driskell and R. A. Tripp, *Chem. Commun.*, 2010, **46**, 3298-3300.
- 2 S. W. Yang and T. Vosch, *Anal. Chem.*, 2011, **83**, 6935-6939.
- 3 W. M. Zheng, T. E. Chase and L. He, *Anal. Methods*, 2014, **6**, 2399-2405.
- 4 Q. Wang, R. D. Li, B. C. Yin and B. C. Ye, *Analyst*, 2015, **140**, 6306-6312.
- 5 W. Wang, T. Kong, D. Zhang, J. A. Zhang and G. S. Cheng, *Anal. Chem.*, 2015, **87**, 10822-10829.
- 6 Y. C. Li, J. Y. Zhang, J. J. Zhao, L. K. Zhao, Y. Q. Cheng and Z. P. Li, *Analyst*, 2016, **141**, 1071-1076.
- 7 X. Li, D. X. Li, W. J. Zhou, Y. Q. Chai, R. Yuan and Y. Xiang, *Chem. Commun.*, 2015, **51**, 11084-11087.
- 8 C. Y. Hong, X. Chen, J. Li, J. H. Chen, G. N. Chen and H. H. Yang, *Chem. Commun.*, 2014, **50**, 3292-3295.
- 9 P. Zhang, X. Y. Wu, R. Yuan and Y. Q. Chai, *Anal. Chem.*, 2015, **87**, 3202-3207.
- 10 T. Y. Wang, E. Viennois, D. Merlin and G. L. Wang, *Anal. Chem.*, 2015, **87**, 8173-8180.

**Fig. S1.** Fluorescence responses of the system at different concentrations of poly(A) polymerase. F and  $F_0$  were fluorescence intensity in the presence or absence of target miRNA, respectively.

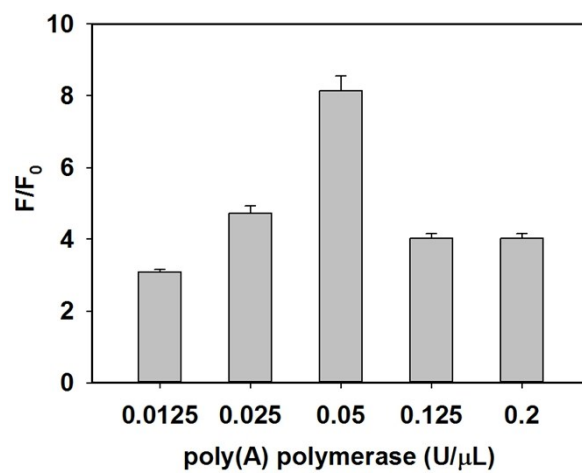

**Fig. S2.** Fluorescence responses of the system at different concentrations of coralyne.  $F$  and  $F_0$  were fluorescence intensity in the presence or absence of target miRNA, respectively.

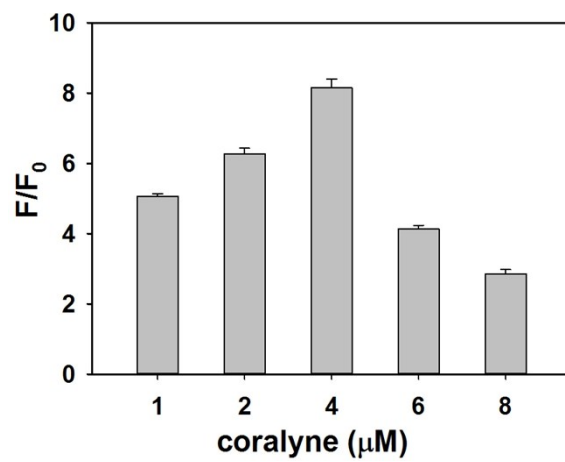

**Fig. S3** Fluorescence responses of the system at different concentrations of ATP.  $F$  and  $F_0$  were fluorescence intensity in the presence or absence of target miRNA, respectively.

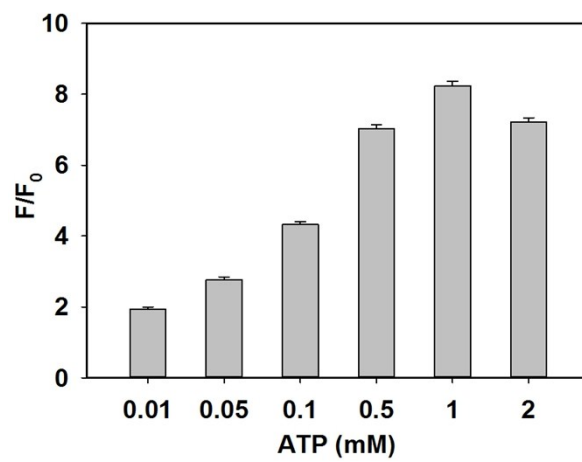



**Fig. S4** Fluorescence responses of the system at different concentrations of biotin-DNA probe.  $F$  and  $F_0$  were fluorescence intensity in the presence or absence of target miRNA, respectively.

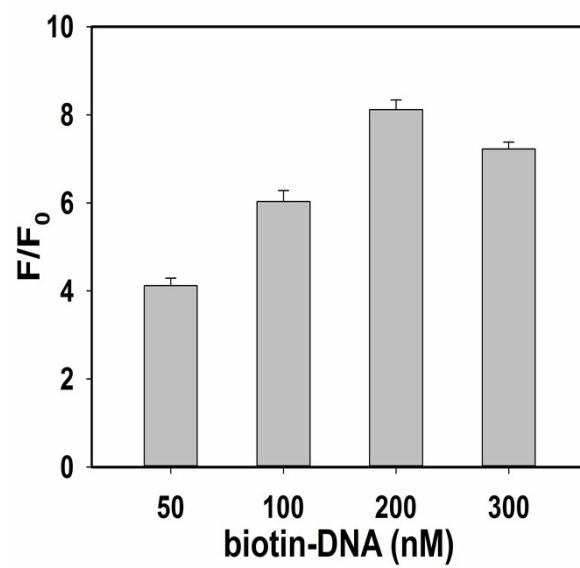

**Fig. S5** Fluorescence responses of the system at different concentrations of SA-MB.  $F$  and  $F_0$  were fluorescence intensity in the presence or absence of target miRNA, respectively.

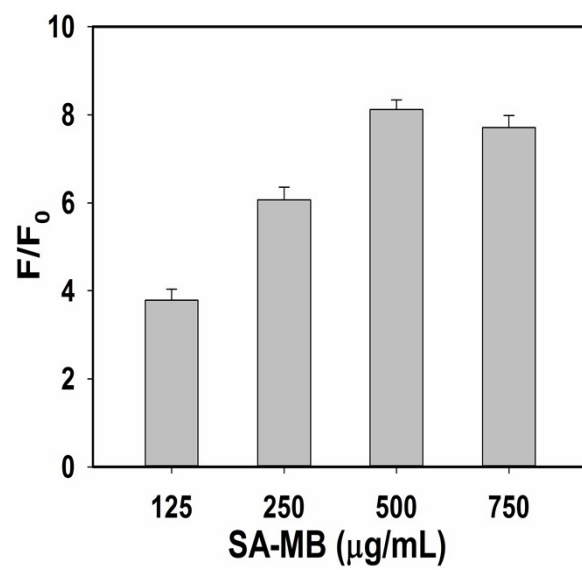

**Fig. S6** Fluorescence responses of the system at different concentrations of SYBR Green I (SG).  $F$  and  $F_0$  were fluorescence intensity in the presence or absence of target miRNA, respectively.

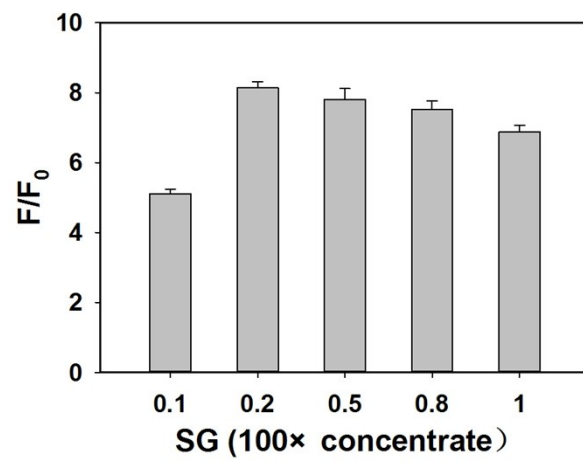

**Fig. S7** Fluorescence responses of the system at different time.  $F$  and  $F_0$  were fluorescence intensity in the presence or absence of target miRNA, respectively.

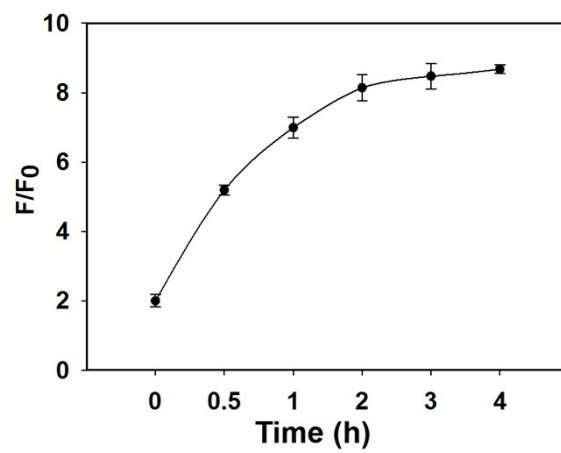

**Table S3.** Recovery experiments of miR-21 in 10% human sera samples

| Sample            | Added miR-21 (nM) | Detected miR-21 (nM) | Recovery (%)   |
|-------------------|-------------------|----------------------|----------------|
| human sera sample | 0                 | 0.0254 ± 0.0522      | Not detectable |
|                   | 20                | 18.827 ± 0.2397      | 94.0           |
|                   | 50                | 48.606 ± 0.9514      | 97.2           |
|                   | 100               | 93.700 ± 5.4329      | 93.7           |

Average of three determinations ± standard deviation
